# Supplementary material for: Global transportation of green hydrogen via liquid carriers: economic and environmental sustainability analysis, policy implications, and future directions
Source: Royal Society of Chemistry journal article supplement (doi:10.1039/d2gc02079c), 2022-01-01
Supplement: d2gc02079c1.pdf [file d2gc02079c1.pdf]

## **Global transportation of green hydrogen via liquid carriers: Economic and environmental sustainability analysis, policy implications, and future directions**

Rofice Dickson<sup>1,†</sup>, Malik Sajawal Akhtar<sup>2,†</sup>, Abiha Abbas<sup>1</sup>, Eun Duck Park<sup>3</sup>, Jay Liu<sup>2,\*</sup>

<sup>1</sup>Department of Chemistry & Chemical Engineering, SBA School of Science and Engineering, Lahore University of Management Sciences (LUMS), Lahore, Pakistan

<sup>2</sup>Department of Chemical Engineering, Pukyong National University, Busan 48513, Republic of Korea

<sup>3</sup>Department of Chemical Engineering and Department of Energy Systems Research, Ajou University, Suwon 16499, Republic of Korea

<sup>†</sup>Both authors have contributed equally to this manuscript

## 1. Process flow diagrams of different liquid carriers

To calculate mass and energy balances for various carriers synthesis (except LH<sub>2</sub> and SNG paths) and dehydrogenation (H<sub>2</sub> retrieval and SNG decomposition), process simulations were performed in Aspen Plus V12.2. The mass and energy balance for SNG and LH<sub>2</sub> was obtained from published studies.<sup>1,2</sup> Appropriate thermodynamic property packages were selected to accurately calculate mass and energy balances. For example, when processing units are operating above 10 bar or dealing with gas phases, Peng Robinson equation of state was used. Likewise, when processing units are operating below 10 bar or dealing with liquid phases, non-random two liquid (NRTL) activity coefficient model was used. The mass storage density of different carriers and operating condition and reactions used in hydrogenation and dehydrogenation of carriers are reported in Table S1.

Table S1 Mass storage density of different carriers and operating condition and reactions used in hydrogenation and dehydrogenation of carriers, including ammonia, methanol, DBT, and MCH.

| Carrier            | Process         | H <sub>2</sub> storage density (wt.%) | Operating conditions | Reaction                                                                                                                                                                                                                                      |
|--------------------|-----------------|---------------------------------------|----------------------|-----------------------------------------------------------------------------------------------------------------------------------------------------------------------------------------------------------------------------------------------|
| NH <sub>3</sub>    | Hydrogenation   | 17.8%                                 | 450°C and 150 bar    | $N_2 + 3H_2 \rightarrow 2NH_3$ $\Delta H = -92.4 \text{ KJ/mol}^{-1}$                                                                                                                                                                         |
| NH <sub>3</sub>    | Dehydrogenation | –                                     | 250°C and 50 bar     | $2NH_3 \rightarrow N_2 + 3H_2$ $\Delta H = 92.4 \text{ KJ/mol}^{-1}$                                                                                                                                                                          |
| CH <sub>3</sub> OH | Hydrogenation   | 12.6%                                 | 250°C and 50 bar     | $CO_2 + H_2 \rightleftharpoons CO + H_2O$ $\Delta H = -90.77 \text{ KJ/mol}$<br>$CO + 2H_2 \rightleftharpoons CH_3OH$ $\Delta H = +41.21 \text{ KJ/mol}$<br>$CO_2 + 3H_2 \rightleftharpoons CH_3OH + H_2O$ $\Delta H = -49.16 \text{ KJ/mol}$ |
| CH <sub>3</sub> OH | Dehydrogenation | –                                     | 250°C and 1 bar      | Phase and chemical equilibrium conversions are estimated using Aspen                                                                                                                                                                          |
| DBT                | Hydrogenation   | 6.2%                                  | 150°C and 50 bar     | $H0.DBT + 9H_2 \rightarrow H18.DBT$                                                                                                                                                                                                           |
| DBT                | Dehydrogenation | –                                     | 310°C and 1 bar      | $H18.DBT + 9H_2 \rightarrow H0.DBT$                                                                                                                                                                                                           |
| MCH                | Hydrogenation   | 6.1%                                  | 200°C and 20 bar     | $3H_2 + C_7H_8 \rightarrow C_7H_{14}$                                                                                                                                                                                                         |
| MCH                | Dehydrogenation | –                                     | 320°C and 1 bar      | $C_7H_{14} + 3H_2 \rightarrow C_7H_8$                                                                                                                                                                                                         |

### 1.1 Ammonia synthesis

Haber–Bosch process was used to model the NH<sub>3</sub> production process. NH<sub>3</sub> is produced as a result of the reaction between N<sub>2</sub> and H<sub>2</sub> at a high temperature of 450°C and a pressure of 150 bar in the presence of a catalyst, typically iron oxide.<sup>3</sup>

Nitrogen is mainly obtained using a cryogenic air separation unit, in which air is compressed from 1 to 7 bar in a multistage compressor (C1) and liquefied, followed by fractional distillation with two columns, high-pressure (HP) and low-pressure (LP) columns.<sup>3,4</sup> Nitrogen gas with a purity of 99.9% is separated at the top of the LP column, and oxygen is collected from the bottom. Pure H<sub>2</sub> gas is available from the water electrolysis plant. Pure nitrogen and H<sub>2</sub> are then mixed in mixer 1 (M1) and introduced into the NH<sub>3</sub> synthesis loop, where they are compressed in a multistage compressor (C2) at a pressure of 150 bar and heated in a heater (HX2) to achieve the required temperature of 450°C. The mixture is then fed to the reactor (R1), where NH<sub>3</sub> is produced and separated in high pressure (HPF) and low-pressure flash (LPF) columns.

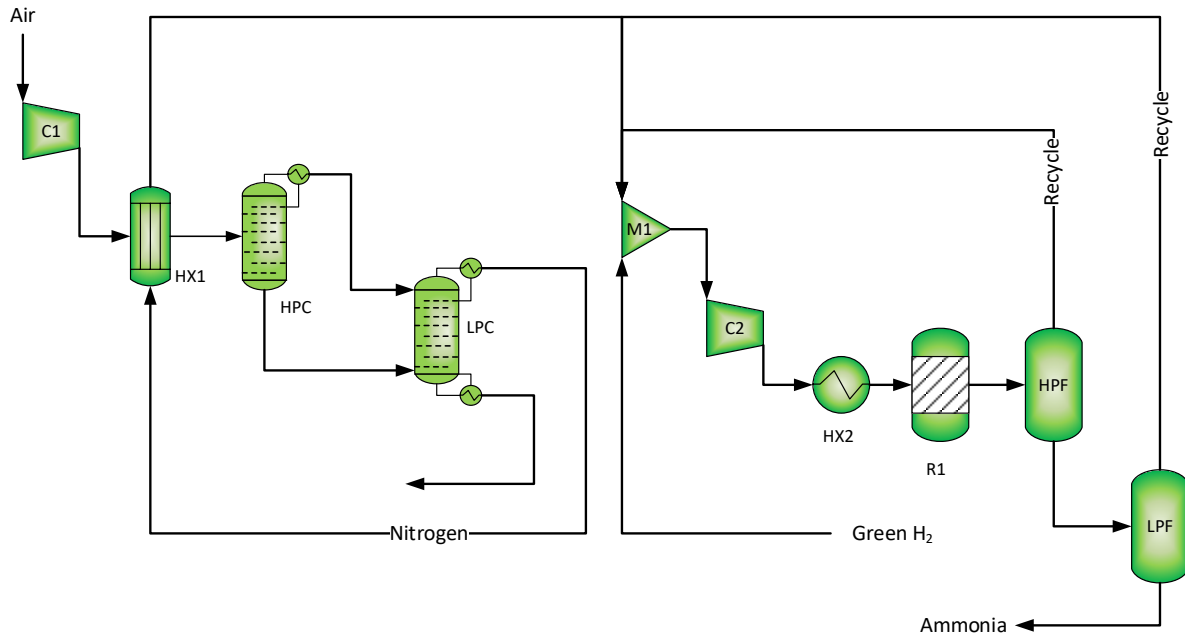

**Figure S1** Simplified process flow diagram of ammonia synthesis.

## 1.2 Ammonia dehydrogenation

$\text{NH}_3$  decomposition is an endothermic reaction and is favorable at a high temperature and in the presence of a catalyst. Reaction conditions are set at  $450^\circ\text{C}$  and 1.01 bar, and ruthenium (Ru)-based catalysts  $[\text{Ru}/\text{La}(\text{x})-\text{Al}_2\text{O}_3]$  are selected because the conversion performance of the decomposition reaction for Ru-based catalysts  $[\text{Ru}/\text{La}(\text{x})-\text{Al}_2\text{O}_3]$  is greater than 95%.<sup>5</sup> Liquid ammonia is passed through heat exchangers (HX1 and HX2) to attain the required reaction temperature and then passes to the reactor for the decomposition process. Heat integration is performed to improve the energy efficiency of the process. The outlet stream is then compressed to increase the pressure from 1.01 bar to 40 bar and then passed to two-stage pressure swing adsorption columns for further purification. The purified hydrogen is collected from the top and a part of it is recycled back for further purification and removal of traces of ammonia and nitrogen.

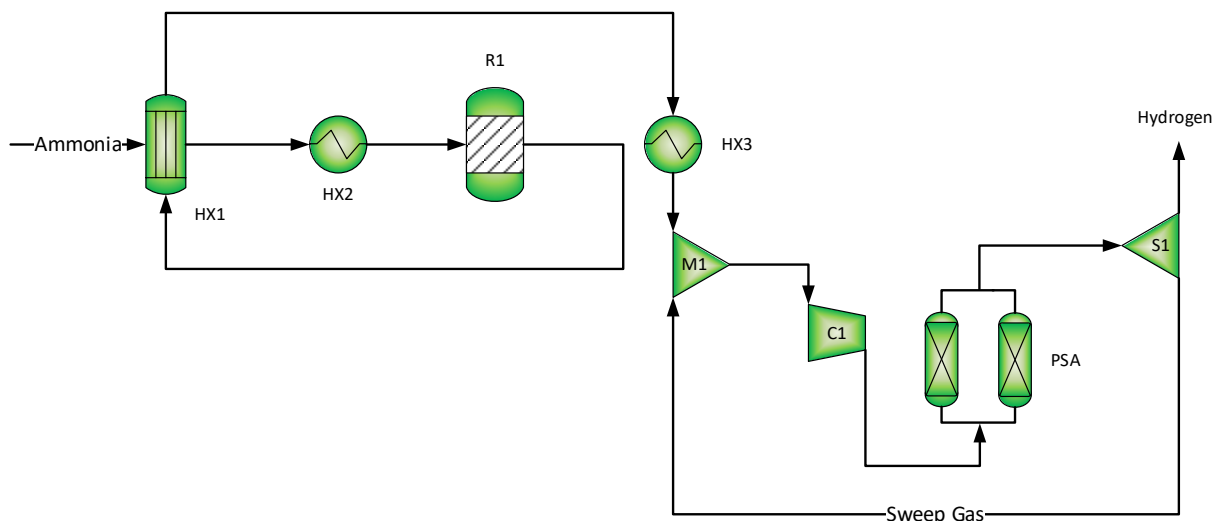

**Figure S2** Simplified process flow diagram of ammonia dehydrogenation.

## 2.1 Methanol synthesis

Methanol is produced via direct CO<sub>2</sub> hydrogenation at 50 bar and 250 °C in the presence of Cu/ZnO/Al<sub>2</sub>O<sub>3</sub> catalyst.<sup>6</sup> The H<sub>2</sub>:CO<sub>2</sub> molar ratio of 3:1 is considered. The CO<sub>2</sub> captured from flue gases and H<sub>2</sub> produced by water electrolysis is mixed in the mixer (M1), which is then compressed (C1) and heated (HX1 and HX2) to reaction conditions. The mixture is finally fed to reactor R1 to produce methanol. The energy of the reactor's effluent (hot stream) is exchanged (HX1) with the reactor's inlet (cold stream) to minimize utility load. The partially cooled reactor effluent from HX1 is further cooled in HX3 and unreacted gases are recovered in two flash columns (HP and LP) and recycled to the mixer (M1). The bottom of LP mainly consisting of water and methanol is fed to the distillation column (DC1) to get pure methanol in the distillate, while the water recovered in bottom and is used to heat (HX4) inlet of distillation columns before discarding it.

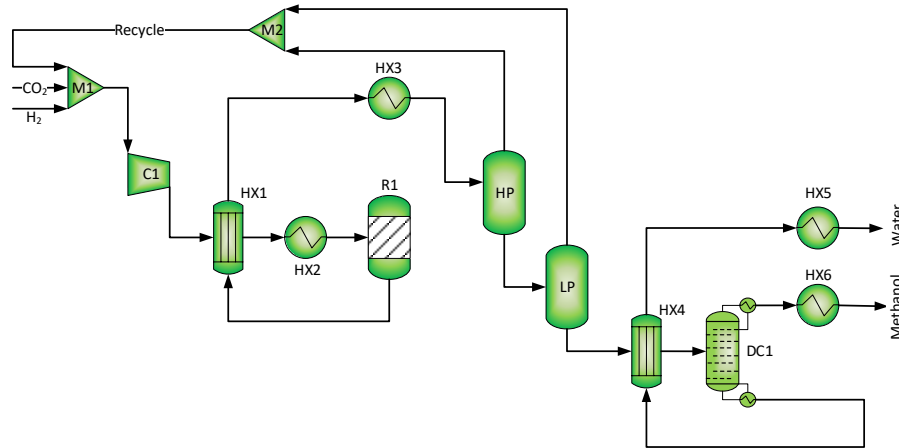

**Figure S3** Simplified process flow diagram of methanol synthesis. HP = High pressure and LP = Low pressure.

## 2.2 Methanol dehydrogenation

Hydrogen is retrieved from methanol through methanol steam reforming (~100% conversion) at 420 °C and 1.01 bar at a molar ratio of 1.5 (water/methanol).<sup>7,8</sup> As shown in Figure S4, methanol and water are mixed in (M1) and passed through the heat exchanger (HX1), and finally heated to 420 °C in heater (HX2). The heated mixture is fed to the reactor (R1) and effluents are separated in a flash drum (F1) after heat integration (HX1). The top stream (mainly CO<sub>2</sub> and hydrogen gases) of F1 is compressed (C1) and fed to pressure swing adsorption (PSA) to recover the pure hydrogen stream. The part of pure recovered hydrogen is recycled to M2 as a sweep gas. Whereas the CO<sub>2</sub> recovered from PSA is discharged to the environment.

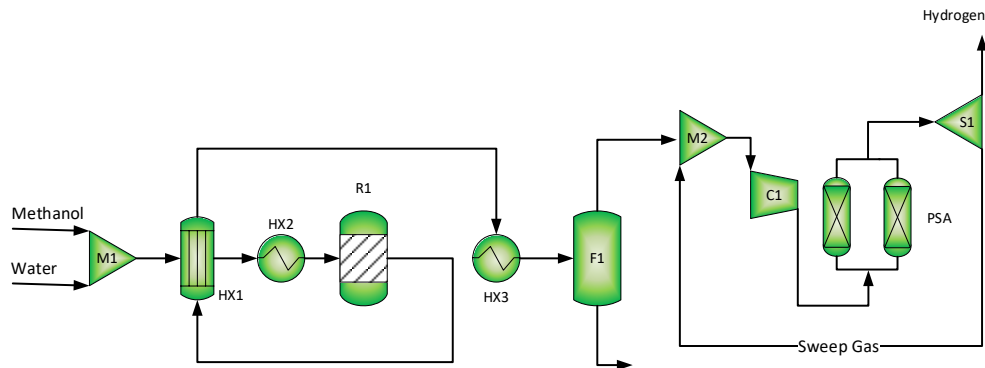

**Figure S4** Simplified process flow diagram of methanol dehydrogenation.

### 3.1 DBT/Toluene hydrogenation

Processing pathways for both DBT and toluene are similar. Toluene/DBT is pumped at 20/50 bar and 200/150 °C. The reactor's effluents are cooled via heat exchanger (HX1) and cooler (HX2) and sent to flash column. The recovered vapors are recycled and liquid products mainly containing hydrogenated products (MCH/H18-DBT) are recovered in bottom streams and cooled before their international transportation.

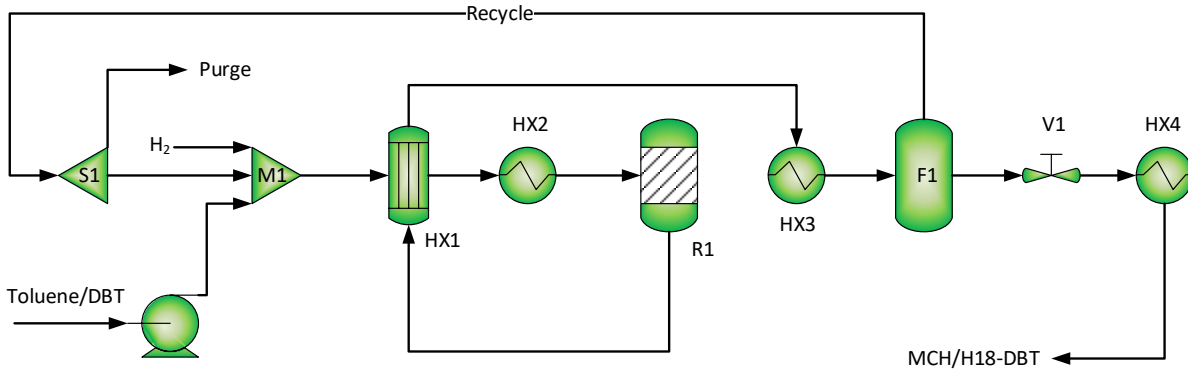

Figure S5 Simplified process flow diagram of MCH and H18-DBT synthesis.

### 3.2 MCH/H18-DBT dehydrogenation

The MCH/H18-DBT is heated to 320/310 °C and sent to the reactor (R1) at 1 atm after exchanging heat (HX1) with reactor's effluent. MCH/H18-DBT is dehydrogenated (95/97%) to toluene/DBT and hydrogen. Hydrogen is recovered in the top stream using two flash drums (F1 and F2). The bottom products of flash drums are heated and sent to the distillation column, where carriers are recovered in bottoms and unreacted MCH/H18-DBT is recycled.

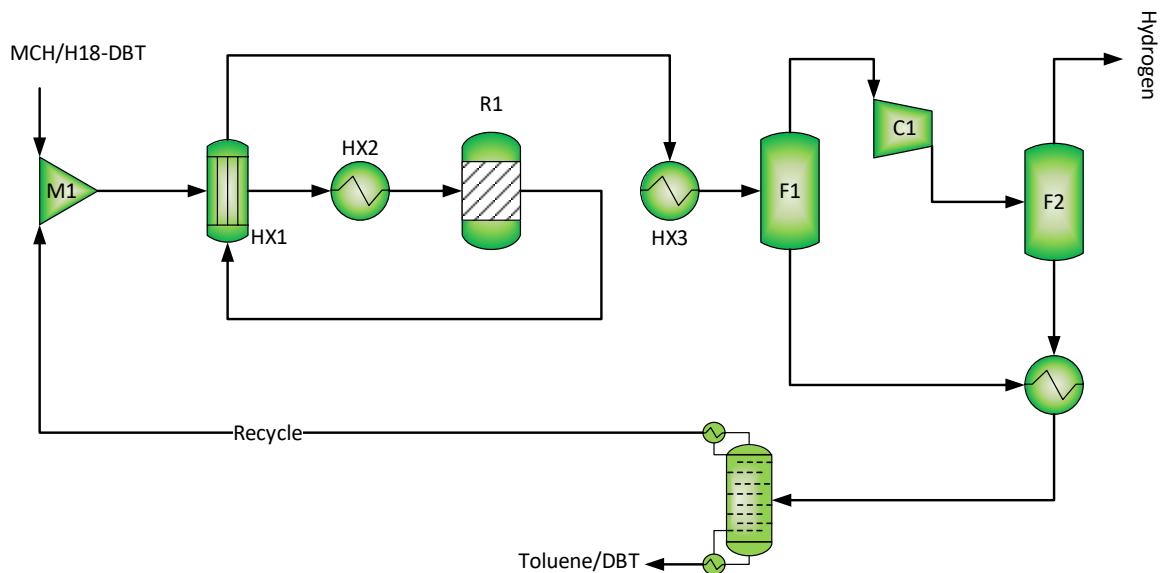

Figure S6 Simplified process flow diagram of MCH and DBT dehydrogenation.

**Table S2** Raw material and utility costs.

| Parameters                       | Value                    |
|----------------------------------|--------------------------|
| <u>Raw material</u> <sup>9</sup> |                          |
| Hydrogen                         | 4 USD/kg                 |
| Carbon dioxide                   | 50 USD/ton               |
| Toluene                          | 82 USD/ton               |
| DBT                              | 400 USD/ton              |
| <u>Utilities</u> <sup>10</sup>   |                          |
| Steam                            | 6.13 USD/GJ              |
| Cooling water                    | 0.28 USD/GJ              |
| Electricity                      | 0.07 USD/kWh             |
| Chilled water                    | 5 USD/GJ                 |
| Wastewater                       | 0.041 USD/m <sup>3</sup> |

**Table S3** Assumptions for hydrogen transportation via road.<sup>11–14</sup>

| Parameters         | LOHC-Truck      | LH <sub>2</sub> or NH <sub>3</sub> Trucks                                          |
|--------------------|-----------------|------------------------------------------------------------------------------------|
| Maximum loading    | 28.5 t          | 50 m <sup>3</sup>                                                                  |
| Average speed      | 45 km/h         | 45 km/h                                                                            |
| Fuel costs         | 0.89 \$/L       | 0.89 \$/L                                                                          |
| Fuel consumption   | 0.35 L/km       | 0.35 L/km                                                                          |
| Operating costs    | 4%              | 4%                                                                                 |
| Loading/unloading  | 1.5 h           | 3 h                                                                                |
| Truck cost         | 206,400 \$/unit | 206,400 \$/unit                                                                    |
| Tank cost          | 103,200 \$/unit | 580,500 and 522,450 \$/unit for LH <sub>2</sub> and NH <sub>3</sub> , respectively |
| Truck depreciation | 8 y             | 8 y                                                                                |
| Tank depreciation  | 12 y            | 12 y                                                                               |
| Truck daily use    | 18 h/d          | 18 h/d                                                                             |

<sup>†</sup>CAPEX and OPEX of LNG truck and tank was similar to that for LH<sub>2</sub>.

**Table S4** Assumptions for hydrogen transportation via ships.

| Parameters            | LOHC ship <sup>†</sup> | LH <sub>2</sub> ship   | NH <sub>3</sub> ship  | LNG ship               |
|-----------------------|------------------------|------------------------|-----------------------|------------------------|
| Maximum loading       | 52,560 t               | 173,400 m <sup>3</sup> | 20,600 m <sup>3</sup> | 145,700 m <sup>3</sup> |
| Average speed         | 26.8 knots             | 33.3 knots             | 29.4 knots            | 22.9 knots             |
| Fuel costs            | 412.8 \$/t             | 412.8 \$/t             | 412.8 \$/t            | 412.8 \$/t             |
| OPEX                  | 7,940 \$/d             | 13,340 \$/d            | 7,552 \$/d            | 10,107 \$/d            |
| Operating costs       | 4%                     | 4%                     | 4%                    | 4%                     |
| Loading/unloading     | 2 d                    | 2 d                    | 2 d                   | 2 d                    |
| Ship costs            | 51.0 M\$/unit          | 168.2 M\$/unit         | 49.8 M\$/unit         | 161.7 M\$/unit         |
| Ship depreciation     | 15 y                   | 15 y                   | 15 y                  | 15 y                   |
| DWT                   | 50,000 t               | 84,554 t               | 18,208                | 84,554                 |
| % of DWT for products | 0.9                    | 0.9                    | 0.9                   | 0.9                    |
| Ship weight           | 11,121 t               | 18,989 t               | 8,842 t               | 18,989                 |

<sup>†</sup>LOHC ships include methanol, DBT, MCH

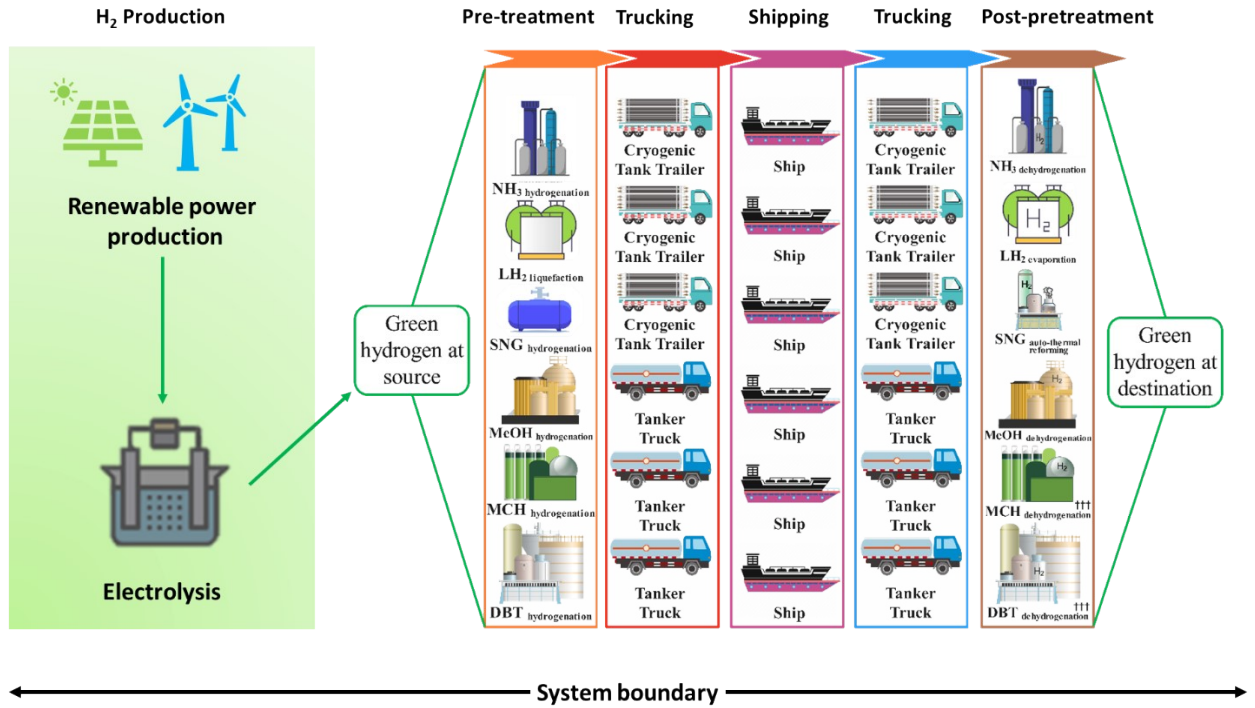

**Figure S7** System boundary for life cycle assessment of process chain for international transport of renewable hydrogen via liquid organic hydrogen carriers and alternatives. Trucking at source and destination country is considered as one stage in LCA.

**Table S5** Inventory data for the international transport of renewable hydrogen via liquid hydrogen carriers. Data is scaled based on one kg hydrogen.

| <b>Stages</b>                     | <b>Methanol</b> | <b>Ammonia</b> | <b>MCH</b> | <b>DBT</b> | <b>SNG</b> | <b>LH<sub>2</sub></b> |
|-----------------------------------|-----------------|----------------|------------|------------|------------|-----------------------|
| <b><u>Hydrogen production</u></b> |                 |                |            |            |            |                       |
| Electricity (kWh)                 | 50.000          | 50.000         | 50.000     | 50.000     | 50.000     | 50.000                |
| Water (kg)                        | 10.000          | 10.000         | 10.000     | 10.000     | 10.000     | 10.000                |
| Nitrogen (g)                      | 0.290           | 0.290          | 0.290      | 0.290      | 0.290      | 0.290                 |
| Potassium hydroxide (g)           | 0.190           | 0.190          | 0.190      | 0.190      | 0.190      | 0.190                 |
| Steam (kg)                        | 0.110           | 0.110          | 0.110      | 0.110      | 0.110      | 0.110                 |
| <b><u>Pre-treatment</u></b>       |                 |                |            |            |            |                       |
| Nitrogen (kg)                     | -               | 4.634          | -          | -          | -          | -                     |
| Carbon dioxide (kg)               | 7.300           | -              | -          | -          | 5.500      | -                     |
| Toluene (kg)                      | -               | -              | 15.240     | -          | -          | -                     |
| Dibenzetoluene (kg)               | -               | -              | -          | 15.013     | -          | -                     |
| Hydrogen Loss (kg)                | 0.001           | 0.001          | 0.001      | 0.001      | 0.001      | 0.030                 |
| Total energy demand (kWh)         | 7.300           | 4.600          | 13.400     | 11.100     | 0.950      | 6.800                 |
| <b><u>Trucking</u></b>            |                 |                |            |            |            |                       |
| Carrier Loss (kg)                 | -               | 0.004          | -          | -          | 0.002      | 0.004                 |
| Diesel (kg)                       | 0.078           | 0.043          | 0.160      | 0.145      | 0.039      | 0.080                 |
| <b><u>Shipping</u></b>            |                 |                |            |            |            |                       |
| Carrier Loss (kg)                 | -               | 0.017          | -          | -          | 0.013      | 0.015                 |
| Diesel (kg)                       | 0.161           | 0.204          | 0.222      | 0.256      | 0.088      | 0.288                 |
| <b><u>Post-treatment</u></b>      |                 |                |            |            |            |                       |
| Nitrogen (kg)                     | -               | -              | -          | -          | -          | -                     |
| Carbon dioxide (kg)               | -               | -              | -          | -          | -          | -                     |
| Toluene (kg)                      | -               | -              | 0.076      | -          | -          | -                     |
| Dibenzetoluene (kg)               | -               | -              | -          | 0.015      | -          | -                     |
| Hydrogen Loss (kg)                | 0.001           | 0.001          | 0.001      | 0.001      | 0.001      | 0.030                 |
| Total energy demand (kWh)         | 7.700           | 14.300         | 18.000     | 11.700     | 15.310     | 0.600                 |



**Table S6** Databases selected for life cycle impact assessment of the international transport of renewable hydrogen via liquid hydrogen carriers.

| Processes                                                                                                                 | Databases     |
|---------------------------------------------------------------------------------------------------------------------------|---------------|
| Process water, ion exchange, production mix, at plant, from groundwater RER S                                             | ELCD          |
| Nitrogen, liquid {RoW}  air separation, cryogenic   APOS, S                                                               | Ecoinvent 3.8 |
| Potassium hydroxide {RoW}  production   APOS, S                                                                           | Ecoinvent 3.8 |
| Steam, in chemical industry {RoW}  market for steam, in chemical industry   APOS, S                                       | Ecoinvent 3.8 |
| Electricity, low voltage {RoW}  electricity production, photovoltaic, 570kWp open ground installation, multi-Si   APOS, S | Ecoinvent 3.8 |
| Electricity, medium voltage {GLO}  market group for   APOS, S                                                             | Ecoinvent 3.8 |
| Electricity, high voltage {RoW}  electricity production, wind, 1-3MW turbine, onshore   APOS, S                           | Ecoinvent 3.8 |
| Toluene, at plant/kg/RNA                                                                                                  | USLCI         |
| Carbon dioxide, in chemical industry {GLO}  market for carbon dioxide, in chemical industry   APOS, S                     | Ecoinvent 3.8 |
| Diesel {RoW}  market for   APOS, S                                                                                        | Ecoinvent 3.8 |
| Chlorine, gaseous {RoW}  sodium chloride electrolysis   APOS, U                                                           | Ecoinvent 3.8 |
| Heat, central or small-scale, other than natural gas {AU}  heat and power co-generation, biogas, gas engine   APOS, S     | Ecoinvent 3.8 |

**Table S7** Analyzed environmental impact categories.

| Impact Category                           | Abbreviation | Unit                                |
|-------------------------------------------|--------------|-------------------------------------|
| Abiotic Depletion Potential               | ADP          | kg Sb eq                            |
| Abiotic Depletion Potential Fossil Fuels  | ADPFF        | MJ                                  |
| Global Warming Potential                  | GWP          | kg CO <sub>2</sub> eq               |
| Ozone Layer Depletion Potential           | ODP          | kg CFC-11 eq                        |
| Human Toxicity Potential                  | HTP          | kg 1,4-DB eq                        |
| Fresh Water Aquatic Ecotoxicity Potential | FWETP        | kg 1,4-DB eq                        |
| Marine Aquatic Ecotoxicity Potential      | MAETP        | kg 1,4-DB eq                        |
| Terrestrial Ecotoxicity Potential         | TETP         | kg 1,4-DB eq                        |
| Photochemical Oxidation Potential         | PCOP         | kg C <sub>2</sub> H <sub>4</sub> eq |
| Acidification Potential                   | ACP          | kg SO <sub>2</sub> eq               |
| Eutrophication Potential                  | EP           | kg PO <sub>4</sub> eq               |

**Table S8** Simplified material balance, energy balance, and capital cost data.

| <b>Parameters</b>            | <b>Methanol</b> | <b>Ammonia</b> | <b>MCH</b> | <b>DBT</b> | <b>SNG<sup>15</sup></b> | <b>LH<sub>2</sub><sup>1,2</sup></b> |
|------------------------------|-----------------|----------------|------------|------------|-------------------------|-------------------------------------|
| <u>Hydrogenation</u>         |                 |                |            |            |                         |                                     |
| CAPEX (\$)                   | 685,594         | 1,626,559      | 375,046    | 611,540    | 5,319,123               | 18,801,100                          |
| Capacity (kg/h)              | 100             | 100            | 100        | 100        | 100                     | 100                                 |
| Scaling exponent             | 0.6             | 0.6            | 0.6        | 0.6        | 0.67                    | 0.66                                |
| Loss                         | 0.1%            | 0.1%           | 0.1%       | 0.1%       | 0.1%                    | 1.65%                               |
| Total energy demand (kWh/kg) | 7.3             | 4.6            | 13.4       | 11.1       | 0.95                    | 6.8                                 |
| <u>Dehydrogenation</u>       |                 |                |            |            |                         |                                     |
| CAPEX (\$)                   | 23,946,473      | 2,482,013      | 303,381    | 673,650    | 2,926,912               | 16,627                              |
| Capacity (kg/h)              | 100             | 100            | 100        | 100        | 100                     | 100                                 |
| Scaling exponent             | 0.6             | 0.6            | 0.6        | 0.6        | 1                       | 1                                   |
| Loss                         | 0.1%            | 0.1%           | 0.1%       | 0.1%       | 0.1%                    | 1.65%                               |
| Total energy demand (kWh/kg) | 7.7             | 14.3           | 18         | 11.7       | 15.31                   | 0.6                                 |

**Table S9** Life cycle indicator results of the international transport of renewable hydrogen via liquid hydrogen carriers.

| <b>Impact categories</b>                    | <b>LH<sub>2</sub></b> | <b>Methanol</b> | <b>Ammonia</b> | <b>SNG</b> | <b>DBT</b> | <b>MCH</b> |
|---------------------------------------------|-----------------------|-----------------|----------------|------------|------------|------------|
| ADP (kg Sb eq.)                             | 1.84E-05              | 2.62E-05        | 3.70E-05       | 1.70E-05   | 7.19E-05   | 5.13E-05   |
| AFFDP (MJ)                                  | 2.78E+01              | 7.54E+01        | 1.27E+02       | 1.24E+02   | 1.07E+03   | 1.01E+03   |
| GWP100 (kg CO <sub>2</sub> eq.)             | 1.0266364             | 5.8736505       | 10.498176      | 10.768718  | 26.696209  | 27.582419  |
| ODP (kg CFC-11 eq.)                         | 3.16E-07              | 3.79E-07        | 5.31E-07       | 4.31E-07   | 7.12E-07   | 7.16E-07   |
| HTP (kg 1,4-DB eq.)                         | 3.55E-01              | 1.11E+00        | 1.85E+00       | 1.71E+00   | 1.29E+01   | 1.20E+01   |
| FWAETP (kg 1,4-DB eq.)                      | 1.47E-02              | 4.31E-02        | 7.22E-02       | 6.88E-02   | 3.54E+00   | 3.22E+00   |
| MAETP (kg 1,4-DB eq.)                       | 6.80E+02              | 4.48E+03        | 8.11E+03       | 8.28E+03   | 2.31E+04   | 2.43E+04   |
| TEP (kg 1,4-DB eq.)                         | 2.09E-03              | 1.12E-02        | 1.99E-02       | 2.01E-02   | 2.67E-02   | 2.89E-02   |
| PCOP (kg C <sub>2</sub> H <sub>4</sub> eq.) | 2.70E-04              | 1.08E-03        | 1.88E-03       | 1.86E-03   | 1.32E-02   | 6.08E-02   |
| AP (kg SO <sub>2</sub> eq.)                 | 5.76E-03              | 2.59E-02        | 7.91E-02       | 4.58E-02   | 1.57E-01   | 1.55E-01   |
| EP (kg PO <sub>4</sub> eq.)                 | 6.32E-04              | 2.95E-03        | 1.26E-02       | 5.24E-03   | 1.66E-02   | 1.61E-02   |

**Table S10** Stagewise breakdown of life cycle indicator results of the international transport of renewable hydrogen via methanol carrier.

| <b>Impact category</b>                      | <b>H<sub>2</sub> Production</b> | <b>Pre-treatment</b> | <b>Trucking</b> | <b>Shipping</b> | <b>Post-Treatment</b> | <b>Total</b> |
|---------------------------------------------|---------------------------------|----------------------|-----------------|-----------------|-----------------------|--------------|
| ADP (kg Sb eq.)                             | 3.15E-07                        | 1.86E-05             | 4.92E-08        | 1.02E-07        | 7.14E-06              | 2.62E-05     |
| AFFDP (MJ)                                  | 1.28E+00                        | 3.78E+00             | 3.92E+00        | 8.09E+00        | 5.83E+01              | 7.54E+01     |
| GWP100 (kg CO <sub>2</sub> eq.)             | 1.27E-01                        | 3.32E-01             | 3.77E-02        | 7.78E-02        | 5.30E+00              | 5.87E+00     |
| ODP (kg CFC-11 eq.)                         | 2.70E-08                        | 3.60E-08             | 5.15E-08        | 1.06E-07        | 1.59E-07              | 3.79E-07     |
| HTP (kg 1,4-DB eq.)                         | 2.03E-02                        | 2.26E-01             | 1.27E-02        | 2.62E-02        | 8.26E-01              | 1.11E+00     |
| FWAETP (kg 1,4-DB eq.)                      | 8.20E-04                        | 5.56E-03             | 1.30E-03        | 2.68E-03        | 3.28E-02              | 4.31E-02     |
| MAETP (kg 1,4-DB eq.)                       | 2.48E+01                        | 3.06E+02             | 1.02E+01        | 2.11E+01        | 4.12E+03              | 4.48E+03     |
| TEP (kg 1,4-DB eq.)                         | 8.54E-05                        | 9.69E-04             | 6.83E-05        | 1.41E-04        | 9.97E-03              | 1.12E-02     |
| PCOP (kg C <sub>2</sub> H <sub>4</sub> eq.) | 2.83E-05                        | 1.02E-04             | 1.63E-05        | 3.36E-05        | 9.02E-04              | 1.08E-03     |
| AP (kg SO <sub>2</sub> eq.)                 | 3.84E-04                        | 1.83E-03             | 4.07E-04        | 8.40E-04        | 2.24E-02              | 2.59E-02     |
| EP (kg PO <sub>4</sub> eq.)                 | 3.94E-05                        | 2.12E-04             | 4.13E-05        | 8.52E-05        | 2.57E-03              | 2.95E-03     |

**Table S11** Stagewise breakdown of life cycle indicator results of the international transport of renewable hydrogen via ammonia carrier.

| <b>Impact category</b>                      | <b>H<sub>2</sub> Production</b> | <b>Pre-treatment</b> | <b>Trucking</b> | <b>Shipping</b> | <b>Post-Treatment</b> | <b>Total</b> |
|---------------------------------------------|---------------------------------|----------------------|-----------------|-----------------|-----------------------|--------------|
| ADP (kg Sb eq.)                             | 3.15E-07                        | 2.33E-05             | 2.71E-08        | 1.29E-07        | 1.33E-05              | 3.70E-05     |
| AFFDP (MJ)                                  | 1.28E+00                        | 4.67E+00             | 2.16E+00        | 1.02E+01        | 1.08E+02              | 1.27E+02     |
| GWP100 (kg CO <sub>2</sub> eq.)             | 1.27E-01                        | 4.10E-01             | 2.08E-02        | 9.86E-02        | 9.84E+00              | 1.05E+01     |
| ODP (kg CFC-11 eq.)                         | 2.70E-08                        | 4.59E-08             | 2.84E-08        | 1.35E-07        | 2.95E-07              | 5.31E-07     |
| HTP (kg 1,4-DB eq.)                         | 2.03E-02                        | 2.49E-01             | 7.41E-03        | 3.49E-02        | 1.53E+00              | 1.85E+00     |
| FWAETP (kg 1,4-DB eq.)                      | 8.20E-04                        | 6.38E-03             | 7.15E-04        | 3.39E-03        | 6.09E-02              | 7.22E-02     |
| MAETP (kg 1,4-DB eq.)                       | 2.48E+01                        | 3.97E+02             | 5.65E+00        | 2.68E+01        | 7.65E+03              | 8.11E+03     |
| TEP (kg 1,4-DB eq.)                         | 8.54E-05                        | 1.13E-03             | 3.77E-05        | 1.79E-04        | 1.85E-02              | 1.99E-02     |
| PCOP (kg C <sub>2</sub> H <sub>4</sub> eq.) | 2.83E-05                        | 1.24E-04             | 8.97E-06        | 4.26E-05        | 1.68E-03              | 1.88E-03     |
| AP (kg SO <sub>2</sub> eq.)                 | 3.84E-04                        | 2.28E-03             | 6.62E-03        | 2.83E-02        | 4.16E-02              | 7.91E-02     |
| EP (kg PO <sub>4</sub> eq.)                 | 3.94E-05                        | 2.63E-04             | 1.42E-03        | 6.06E-03        | 4.77E-03              | 1.26E-02     |

**Table S12** Stagewise breakdown of life cycle indicator results of the international transport of renewable hydrogen via MCH carrier.

| <b>Impact category</b>                      | <b>H<sub>2</sub> Production</b> | <b>Pre-treatment</b> | <b>Trucking</b> | <b>Shipping</b> | <b>Post-Treatment</b> | <b>Total</b> |
|---------------------------------------------|---------------------------------|----------------------|-----------------|-----------------|-----------------------|--------------|
| ADP (kg Sb eq.)                             | 3.15E-07                        | 3.41E-05             | 1.01E-07        | 1.40E-07        | 1.67E-05              | 5.13E-05     |
| AFFDP (MJ)                                  | 1.28E+00                        | 8.53E+02             | 8.04E+00        | 1.12E+01        | 1.36E+02              | 1.01E+03     |
| GWP100 (kg CO <sub>2</sub> eq.)             | 1.27E-01                        | 1.49E+01             | 7.73E-02        | 1.07E-01        | 1.24E+01              | 2.76E+01     |
| ODP (kg CFC-11 eq.)                         | 2.70E-08                        | 6.65E-08             | 1.06E-07        | 1.47E-07        | 3.71E-07              | 7.16E-07     |
| HTP (kg 1,4-DB eq.)                         | 2.03E-02                        | 9.94E+00             | 2.61E-02        | 3.62E-02        | 1.96E+00              | 1.20E+01     |
| FWAETP (kg 1,4-DB eq.)                      | 8.20E-04                        | 3.14E+00             | 2.66E-03        | 3.69E-03        | 7.66E-02              | 3.22E+00     |
| MAETP (kg 1,4-DB eq.)                       | 2.48E+01                        | 1.46E+04             | 2.10E+01        | 2.91E+01        | 9.63E+03              | 2.43E+04     |
| TEP (kg 1,4-DB eq.)                         | 8.54E-05                        | 5.20E-03             | 1.40E-04        | 1.95E-04        | 2.33E-02              | 2.89E-02     |
| PCOP (kg C <sub>2</sub> H <sub>4</sub> eq.) | 2.83E-05                        | 1.02E-02             | 3.34E-05        | 4.63E-05        | 5.05E-02              | 6.08E-02     |
| AP (kg SO <sub>2</sub> eq.)                 | 3.84E-04                        | 1.01E-01             | 8.35E-04        | 1.16E-03        | 5.24E-02              | 1.55E-01     |
| EP (kg PO <sub>4</sub> eq.)                 | 3.94E-05                        | 9.85E-03             | 8.47E-05        | 1.18E-04        | 6.00E-03              | 1.61E-02     |

**Table S13** Stagewise breakdown of life cycle indicator results of the international transport of renewable hydrogen via DBT carrier.

| <b>Impact category</b>                      | <b>H<sub>2</sub> Production</b> | <b>Pre-treatment</b> | <b>Trucking</b> | <b>Shipping</b> | <b>Post-Treatment</b> | <b>Total</b> |
|---------------------------------------------|---------------------------------|----------------------|-----------------|-----------------|-----------------------|--------------|
| ADP (kg Sb eq.)                             | 3.15E-07                        | 6.05E-05             | 9.14E-08        | 1.61E-07        | 1.09E-05              | 7.19E-05     |
| AFFDP (MJ)                                  | 1.28E+00                        | 9.64E+02             | 7.28E+00        | 1.29E+01        | 8.86E+01              | 1.07E+03     |
| GWP100 (kg CO <sub>2</sub> eq.)             | 1.27E-01                        | 1.83E+01             | 7.01E-02        | 1.24E-01        | 8.05E+00              | 2.67E+01     |
| ODP (kg CFC-11 eq.)                         | 2.70E-08                        | 1.79E-07             | 9.57E-08        | 1.69E-07        | 2.41E-07              | 7.12E-07     |
| HTP (kg 1,4-DB eq.)                         | 2.03E-02                        | 1.16E+01             | 2.36E-02        | 4.17E-02        | 1.26E+00              | 1.29E+01     |
| FWAETP (kg 1,4-DB eq.)                      | 8.20E-04                        | 3.48E+00             | 2.41E-03        | 4.26E-03        | 4.98E-02              | 3.54E+00     |
| MAETP (kg 1,4-DB eq.)                       | 2.48E+01                        | 1.68E+04             | 1.90E+01        | 3.36E+01        | 6.26E+03              | 2.31E+04     |
| TEP (kg 1,4-DB eq.)                         | 8.54E-05                        | 1.11E-02             | 1.27E-04        | 2.24E-04        | 1.51E-02              | 2.67E-02     |
| PCOP (kg C <sub>2</sub> H <sub>4</sub> eq.) | 2.83E-05                        | 1.17E-02             | 3.03E-05        | 5.34E-05        | 1.37E-03              | 1.32E-02     |
| AP (kg SO <sub>2</sub> eq.)                 | 3.84E-04                        | 1.20E-01             | 7.57E-04        | 1.34E-03        | 3.40E-02              | 1.57E-01     |
| EP (kg PO <sub>4</sub> eq.)                 | 3.94E-05                        | 1.24E-02             | 7.67E-05        | 1.36E-04        | 3.90E-03              | 1.66E-02     |

**Table S14** Stagewise breakdown of life cycle indicator results of the international transport of renewable hydrogen via SNG carrier.

| <b>Impact category</b>                      | <b>H<sub>2</sub> Production</b> | <b>Pre-treatment</b> | <b>Trucking</b> | <b>Shipping</b> | <b>Post-Treatment</b> | <b>Total</b> |
|---------------------------------------------|---------------------------------|----------------------|-----------------|-----------------|-----------------------|--------------|
| ADP (kg Sb eq.)                             | 3.15E-07                        | 2.42E-06             | 2.46E-08        | 5.55E-08        | 1.42E-05              | 1.70E-05     |
| AFFDP (MJ)                                  | 1.28E+00                        | 4.92E-01             | 1.96E+00        | 4.42E+00        | 1.16E+02              | 1.24E+02     |
| GWP100 (kg CO <sub>2</sub> eq.)             | 1.27E-01                        | 4.32E-02             | 1.88E-02        | 4.25E-02        | 1.05E+01              | 1.08E+01     |
| ODP (kg CFC-11 eq.)                         | 2.70E-08                        | 4.68E-09             | 2.57E-08        | 5.81E-08        | 3.15E-07              | 4.31E-07     |
| HTP (kg 1,4-DB eq.)                         | 2.03E-02                        | 2.94E-02             | 6.35E-03        | 1.43E-02        | 1.64E+00              | 1.71E+00     |
| FWAETP (kg 1,4-DB eq.)                      | 8.20E-04                        | 7.23E-04             | 6.49E-04        | 1.46E-03        | 6.51E-02              | 6.88E-02     |
| MAETP (kg 1,4-DB eq.)                       | 2.48E+01                        | 3.99E+01             | 5.12E+00        | 1.16E+01        | 8.19E+03              | 8.28E+03     |
| TEP (kg 1,4-DB eq.)                         | 8.54E-05                        | 1.26E-04             | 3.42E-05        | 7.71E-05        | 1.98E-02              | 2.01E-02     |
| PCOP (kg C <sub>2</sub> H <sub>4</sub> eq.) | 2.83E-05                        | 1.33E-05             | 8.14E-06        | 1.84E-05        | 1.79E-03              | 1.86E-03     |
| AP (kg SO <sub>2</sub> eq.)                 | 3.84E-04                        | 2.39E-04             | 2.03E-04        | 4.59E-04        | 4.45E-02              | 4.58E-02     |
| EP (kg PO <sub>4</sub> eq.)                 | 3.94E-05                        | 2.76E-05             | 2.06E-05        | 4.66E-05        | 5.11E-03              | 5.24E-03     |

**Table S15** Stagewise breakdown of life cycle indicator results of the international transport of renewable hydrogen via LH<sub>2</sub> carrier.

| <b>Impact category</b>                      | <b>H<sub>2</sub> Production</b> | <b>Pre-treatment</b> | <b>Trucking</b> | <b>Shipping</b> | <b>Post-Treatment</b> | <b>Total</b> |
|---------------------------------------------|---------------------------------|----------------------|-----------------|-----------------|-----------------------|--------------|
| ADP (kg Sb eq.)                             | 3.15E-07                        | 1.73E-05             | 5.04E-08        | 1.82E-07        | 5.57E-07              | 1.84E-05     |
| AFFDP (MJ)                                  | 1.28E+00                        | 3.52E+00             | 4.02E+00        | 1.45E+01        | 4.55E+00              | 2.78E+01     |
| GWP100 (kg CO <sub>2</sub> eq.)             | 1.27E-01                        | 3.09E-01             | 3.87E-02        | 1.39E-01        | 4.13E-01              | 1.03E+00     |
| ODP (kg CFC-11 eq.)                         | 2.70E-08                        | 3.35E-08             | 5.28E-08        | 1.90E-07        | 1.24E-08              | 3.16E-07     |
| HTP (kg 1,4-DB eq.)                         | 2.03E-02                        | 2.10E-01             | 1.30E-02        | 4.69E-02        | 6.44E-02              | 3.55E-01     |
| FWAETP (kg 1,4-DB eq.)                      | 8.20E-04                        | 5.18E-03             | 1.33E-03        | 4.79E-03        | 2.55E-03              | 1.47E-02     |
| MAETP (kg 1,4-DB eq.)                       | 2.48E+01                        | 2.85E+02             | 1.05E+01        | 3.78E+01        | 3.21E+02              | 6.80E+02     |
| TEP (kg 1,4-DB eq.)                         | 8.54E-05                        | 9.03E-04             | 7.01E-05        | 2.52E-04        | 7.77E-04              | 2.09E-03     |
| PCOP (kg C <sub>2</sub> H <sub>4</sub> eq.) | 2.83E-05                        | 9.48E-05             | 1.67E-05        | 6.01E-05        | 7.03E-05              | 2.70E-04     |
| AP (kg SO <sub>2</sub> eq.)                 | 3.84E-04                        | 1.71E-03             | 4.17E-04        | 1.50E-03        | 1.75E-03              | 5.76E-03     |
| EP (kg PO <sub>4</sub> eq.)                 | 3.94E-05                        | 1.97E-04             | 4.23E-05        | 1.52E-04        | 2.00E-04              | 6.32E-04     |

## References

- 1 M. Reuß, T. Grube, M. Robinius, P. Preuster, P. Wasserscheid and D. Stolten, *Appl. Energy*, 2017, **200**, 290–302.
- 2 K. Stolzenburg and R. Mubbala, *Hydrog. Fuel Cells Nord. Countries, Novemb. 1, 2013*, 2013, 33.
- 3 M. S. Akhtar and J. Liu, 2021, **50**, 141–146.
- 4 M. S. Akhtar and J. J. Liu, 2022, **49**, 1897–1902.
- 5 D. B. Chung, H. Y. Kim, M. Jeon, D. H. Lee, H. S. Park, S. H. Choi, S. W. Nam, S. C. Jang, J. H. Park, K. Y. Lee and C. W. Yoon, *Int. J. Hydrogen Energy*, 2017, **42**, 1639–1647.
- 6 C. Yang, Z. Ma, N. Zhao, W. Wei, T. Hu and Y. Sun, *Catal. Today*, 2006, **115**, 222–227.
- 7 M. Saito, *Catal. Surv. from Japan*, 1998, **2**, 175–184.
- 8 C. Zhang, Z. Yuan, N. Liu and S. Wang, *Fuel Cells*, 2006, **6**, 466–471.
- 9 M. Niermann, S. Timmerberg, S. Drünert and M. Kaltschmitt, *Renew. Sustain. Energy Rev.*, 2021, **135**, 110171.
- 10 R. Dickson, E. Mancini, N. Garg, J. Woodley, K. Gernaey, M. Pinelo, J. Liu and S. S. Mansouri, *Energy Environ. Sci.*, , DOI:10.1039/D0EE03545A.
- 11 D. Teichmann, W. Arlt and P. Wasserscheid, *Int. J. Hydrogen Energy*, 2012, **37**, 18118–18132.
- 12 F. I. Gallardo, A. Monforti Ferrario, M. Lamagna, E. Bocci, D. Astiaso Garcia and T. E. Baeza-Jeria, *Int. J. Hydrogen Energy*, 2021, **46**, 13709–13728.
- 13 U.S. Energy Information Administration, PETROLEUM & OTHER LIQUIDS: EIA, [https://www.eia.gov/dnav/pet/hist/LeafHandler.ashx?n=pet&s=emm\\_epm0\\_pte\\_nus\\_dpg&f=m](https://www.eia.gov/dnav/pet/hist/LeafHandler.ashx?n=pet&s=emm_epm0_pte_nus_dpg&f=m), (accessed 30 June 2021).
- 14 M. Mintz, J. Gillette, A. Elgowainy, M. Paster, M. Ringer, D. Brown and J. Li, *HDSAM: A Hydrogen Delivery Scenario Analysis Model to Analyze Hydrogen Distribution Options*, 2006.
- 15 F. Re, C. Toro and E. Sciubba, in *Proceedings of the ASME 2017 International Mechanical Engineering Congress and Exposition IMECE2017*, 2017, vol. 6.
